# Supplementary material for: A Hybrid Genetic Linkage Map of Two Ecologically and Morphologically Divergent Midas Cichlid Fishes (Amphilophus spp.) Obtained by Massively Parallel DNA Sequencing (ddRADSeq)
Source: PubMed Central journal article supplement (PMC3538344; doi:10.1534/g3.112.003897), 2013-01-01
Supplement: supp_3.1.65_FigureS1.pdf [file supp_3.1.65_FigureS1.pdf]

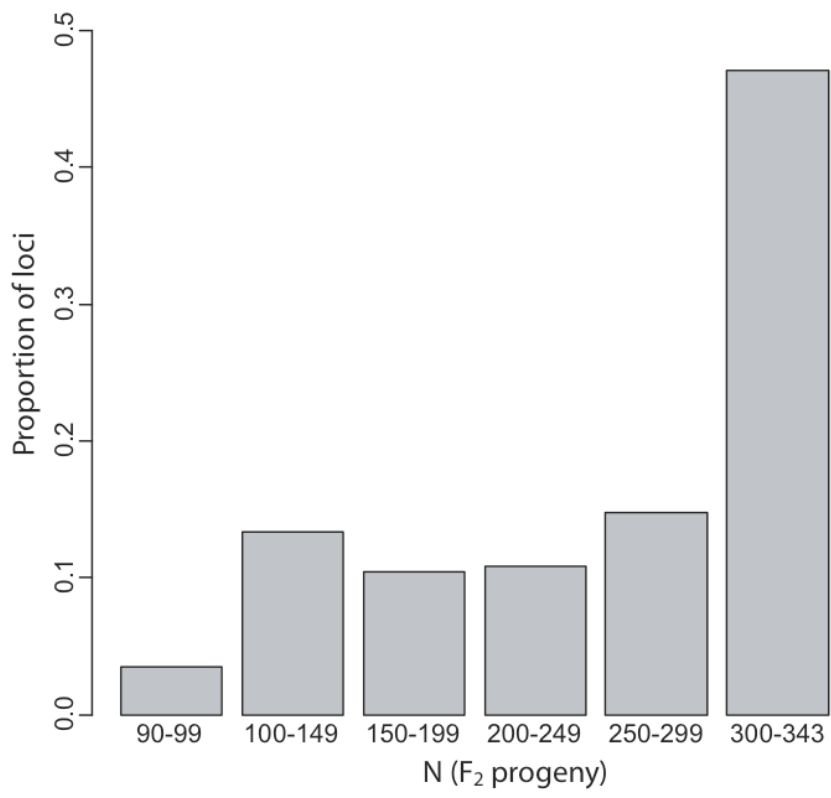

**Figure S1** Proportion of loci present in number (N) of individuals
