# Supplementary material for: A Hybrid Genetic Linkage Map of Two Ecologically and Morphologically Divergent Midas Cichlid Fishes (Amphilophus spp.) Obtained by Massively Parallel DNA Sequencing (ddRADSeq)
Source: PubMed Central journal article supplement (PMC3538344; doi:10.1534/g3.112.003897), 2013-01-01
Supplement: supp_3.1.65_TableS2.pdf [file supp_3.1.65_TableS2.pdf]

**Table S2 Individual's sequenced genomic output**

|                              | N   | N loci | N loci<br>polymorphic | N SNPs | SNP frequency | coverage |
|------------------------------|-----|--------|-----------------------|--------|---------------|----------|
| <i>A. zalius</i> , male      | 1   | 142740 | 9531                  | 12764  | 0.089         | 15.6x    |
| <i>A. astorquii</i> , female | 1   | 139109 | 8150                  | 11172  | 0.080         | 15.0x    |
| F1 hybrids                   | 2   | 140925 | 9336                  | 11968  | 0.090         | 14.0x    |
| F2 hybrids                   | 343 | 36851  | 1633                  | 2257   | 0.061         | 15.2x    |

Note that in the parents and F<sub>1</sub> hybrids a higher gel size range was selected than for F<sub>2</sub> individuals and therefore they exhibit a higher number of loci.
