# Supplementary material for: A Hybrid Genetic Linkage Map of Two Ecologically and Morphologically Divergent Midas Cichlid Fishes (Amphilophus spp.) Obtained by Massively Parallel DNA Sequencing (ddRADSeq)
Source: PubMed Central journal article supplement (PMC3538344; doi:10.1534/g3.112.003897), 2013-01-01
Supplement: supp_3.1.65_TableS4.pdf [file supp_3.1.65_TableS4.pdf]

**Table S4** Length and number of markers per linkage group and average spacing distance between markers

| LG             | Spacing [cM] | Markers [N] | Length [cM] |
|----------------|--------------|-------------|-------------|
| 1              | 1.61         | 49          | 77.1        |
| 2              | 2.56         | 28          | 69.2        |
| 3              | 2.16         | 33          | 69.1        |
| 4              | 1.44         | 49          | 69.0        |
| 5              | 1.25         | 54          | 66.1        |
| 6              | 2.18         | 31          | 65.4        |
| 7              | 3.27         | 21          | 65.4        |
| 8              | 2.84         | 24          | 65.3        |
| 9              | 3.32         | 20          | 63.0        |
| 10             | 1.53         | 42          | 62.9        |
| 11             | 1.67         | 38          | 61.9        |
| 12             | 2.18         | 29          | 61.1        |
| 13             | 1.89         | 33          | 60.4        |
| 14             | 2.99         | 21          | 59.8        |
| 15             | 1.42         | 43          | 59.7        |
| 16             | 4.57         | 14          | 59.4        |
| 17             | 1.36         | 44          | 58.4        |
| 18             | 1.87         | 32          | 58.0        |
| 19             | 2.04         | 29          | 57.1        |
| 20             | 6.07         | 10          | 54.6        |
| 21             | 1.65         | 34          | 54.4        |
| 22             | 2.69         | 21          | 53.7        |
| 23             | 1.03         | 51          | 51.5        |
| 24             | 1.27         | 3           | 2.5         |
| 25             | 1.99         | 2           | 2.0         |
| <b>Average</b> | 1.95         | 30.2        | 59.4        |
| <b>Total</b>   | -            | 755         | 1426.9      |
