# Supplementary material for: A Hybrid Genetic Linkage Map of Two Ecologically and Morphologically Divergent Midas Cichlid Fishes (Amphilophus spp.) Obtained by Massively Parallel DNA Sequencing (ddRADSeq)
Source: PubMed Central journal article supplement (PMC3538344; doi:10.1534/g3.112.003897), 2013-01-01
Supplement: supp_3.1.65_TableS5.pdf [file supp_3.1.65_TableS5.pdf]

**Table S5 RAD markers used in the comparative analyses and mapped to tilapia, stickleback and medaka**

| <b>RAD-ID</b> | <b>Midas LG</b> | <b>Mapped to:</b> | <b>LG</b> | <b>LG size</b> | <b>E-value</b> | <b>Start [bp]</b> | <b>Length [bp]</b> |
|---------------|-----------------|-------------------|-----------|----------------|----------------|-------------------|--------------------|
| 36474         | 1               | tilapia           | LG16-21   | 34890008       | 1.00E-24       | 27352408          | 106                |
| 43465         | 1               | tilapia           | LG3       | 19325363       | 2.00E-26       | 18187493          | 109                |
| 100846        | 1               | tilapia           | LG3       | 19325363       | 2.00E-26       | 12853769          | 109                |
| 16458         | 1               | tilapia           | LG3       | 19325363       | 3.00E-41       | 11674415          | 110                |
| 92986         | 1               | tilapia           | LG3       | 19325363       | 2.00E-42       | 10094525          | 96                 |
| 94064         | 1               | tilapia           | LG3       | 19325363       | 3.00E-16       | 10064159          | 80                 |
| 45072         | 1               | tilapia           | LG3       | 19325363       | 7.00E-36       | 7854642           | 93                 |
| 31789         | 1               | tilapia           | LG3       | 19325363       | 1.00E-15       | 5068289           | 96                 |
| 66818         | 2               | tilapia           | LG6       | 36725243       | 3.00E-41       | 33567821          | 110                |
| 17185         | 2               | tilapia           | LG6       | 36725243       | 4.00E-25       | 31586102          | 95                 |
| 24490         | 2               | tilapia           | LG6       | 36725243       | 3.00E-35       | 25607155          | 108                |
| 16242         | 2               | tilapia           | LG6       | 36725243       | 3.00E-41       | 28181098          | 110                |
| 109951        | 2               | tilapia           | LG6       | 36725243       | 1.00E-24       | 35791579          | 62                 |
| 76409         | 2               | tilapia           | LG6       | 36725243       | 2.00E-48       | 7839121           | 110                |
| 55453         | 2               | tilapia           | LG6       | 36725243       | 2.00E-39       | 7709326           | 99                 |
| 98129         | 2               | tilapia           | LG6       | 36725243       | 3.00E-16       | 11650745          | 72                 |
| 49108         | 2               | tilapia           | LG6       | 36725243       | 2.00E-48       | 11279958          | 110                |
| 41452         | 3               | tilapia           | LG14      | 34191023       | 2.00E-26       | 32476326          | 93                 |
| 40968         | 3               | tilapia           | LG14      | 34191023       | 2.00E-27       | 33214185          | 83                 |
| 7637          | 3               | tilapia           | LG14      | 34191023       | 3.00E-32       | 31227075          | 83                 |
| 63920         | 3               | tilapia           | LG14      | 34191023       | 1.00E-31       | 3626355           | 110                |
| 99911         | 3               | tilapia           | LG14      | 34191023       | 2.00E-33       | 10534804          | 97                 |
| 83872         | 3               | tilapia           | LG14      | 34191023       | 1.00E-28       | 6925433           | 89                 |
| 6497          | 3               | tilapia           | LG14      | 34191023       | 4.00E-31       | 27684349          | 93                 |
| 5041          | 3               | tilapia           | LG3       | 19325363       | 1.00E-15       | 12923096          | 71                 |
| 20407         | 4               | tilapia           | LG5       | 37389089       | 4.00E-34       | 31342438          | 110                |
| 5853          | 4               | tilapia           | LG5       | 37389089       | 6.00E-27       | 13957074          | 70                 |
| 84930         | 4               | tilapia           | LG5       | 37389089       | 1.00E-34       | 13964233          | 95                 |
| 17788         | 4               | tilapia           | LG5       | 37389089       | 4.00E-31       | 7297095           | 97                 |
| 70499         | 4               | tilapia           | LG6       | 36725243       | 1.00E-15       | 31184138          | 67                 |
| 100566        | 5               | tilapia           | LG23      | 20779993       | 1.00E-55       | 7153106           | 110                |
| 101011        | 5               | tilapia           | scaffold3 | NA             | 9.00E-20       | 3004164           | 98                 |
| 124145        | 5               | tilapia           | LG4       | 28679955       | 7.00E-33       | 2864401           | 104                |
| 107800        | 5               | tilapia           | LG23      | 20779993       | 1.00E-31       | 13864662          | 110                |
| 70700         | 5               | tilapia           | LG23      | 20779993       | 3.00E-19       | 15261246          | 57                 |
| 105100        | 5               | tilapia           | LG23      | 20779993       | 5.00E-18       | 18390222          | 75                 |

|        |    |         |             |          |          |          |     |
|--------|----|---------|-------------|----------|----------|----------|-----|
| 25979  | 5  | tilapia | LG23        | 20779993 | 1.00E-18 | 20545645 | 84  |
| 18719  | 5  | tilapia | scaffold4   | NA       | 5.00E-18 | 217438   | 71  |
| 26115  | 5  | tilapia | scaffold4   | NA       | 6.00E-27 | 1258943  | 74  |
| 46405  | 5  | tilapia | LG2         | 25048291 | 9.00E-20 | 11839398 | 82  |
| 20172  | 5  | tilapia | LG17        | 31749960 | 2.00E-36 | 2679164  | 110 |
| 14319  | 5  | tilapia | scaffold131 | NA       | 1.00E-24 | 351651   | 110 |
| 15733  | 5  | tilapia | scaffold131 | NA       | 1.00E-25 | 482104   | 84  |
| 33213  | 5  | tilapia | LG6         | 36725243 | 1.00E-18 | 25758117 | 76  |
| 134694 | 5  | tilapia | scaffold67  | NA       | 1.00E-25 | 409235   | 104 |
| 116962 | 6  | tilapia | LG13        | 32787261 | 1.00E-18 | 13164943 | 68  |
| 22729  | 6  | tilapia | LG11        | 33447472 | 1.00E-18 | 16371622 | 60  |
| 11412  | 6  | tilapia | LG11        | 33447472 | 1.00E-25 | 17320254 | 95  |
| 75436  | 6  | tilapia | LG11        | 33447472 | 1.00E-25 | 11552185 | 92  |
| 87932  | 6  | tilapia | LG11        | 33447472 | 1.00E-43 | 12025784 | 110 |
| 44241  | 6  | tilapia | LG11        | 33447472 | 4.00E-31 | 12586794 | 108 |
| 34216  | 6  | tilapia | LG11        | 33447472 | 1.00E-40 | 26837191 | 109 |
| 28307  | 7  | tilapia | scaffold66  | NA       | 6.00E-30 | 773981   | 107 |
| 79933  | 7  | tilapia | LG20        | 31470686 | 3.00E-16 | 9262740  | 52  |
| 66611  | 7  | tilapia | LG20        | 31470686 | 1.00E-18 | 12387108 | 96  |
| 38956  | 7  | tilapia | LG20        | 31470686 | 8.00E-48 | 26889516 | 109 |
| 27002  | 7  | tilapia | LG20        | 31470686 | 1.00E-24 | 30315062 | 82  |
| 50804  | 8  | tilapia | LG1         | 31194787 | 2.00E-36 | 9414368  | 110 |
| 2276   | 9  | tilapia | LG7         | 51042256 | 2.00E-29 | 33398893 | 110 |
| 62272  | 9  | tilapia | LG7         | 51042256 | 2.00E-33 | 33163211 | 89  |
| 102680 | 9  | tilapia | LG7         | 51042256 | 1.00E-15 | 25377123 | 83  |
| 67458  | 9  | tilapia | LG7         | 51042256 | 3.00E-19 | 14336881 | 85  |
| 35953  | 10 | tilapia | LG15        | 26684556 | 2.00E-26 | 9399831  | 69  |
| 61040  | 10 | tilapia | LG6         | 36725243 | 1.00E-15 | 9454319  | 51  |
| 18661  | 10 | tilapia | LG15        | 26684556 | 2.00E-17 | 25997391 | 102 |
| 37971  | 10 | tilapia | LG15        | 26684556 | 2.00E-48 | 24044802 | 106 |
| 130058 | 10 | tilapia | LG15        | 26684556 | 1.00E-55 | 22676238 | 110 |
| 3820   | 10 | tilapia | LG15        | 26684556 | 6.00E-30 | 19826960 | 103 |
| 57690  | 10 | tilapia | LG15        | 26684556 | 2.00E-42 | 14597823 | 108 |
| 19144  | 10 | tilapia | LG15        | 26684556 | 5.00E-46 | 15270678 | 110 |
| 40973  | 10 | tilapia | LG15        | 26684556 | 4.00E-22 | 14895757 | 110 |
| 31355  | 10 | tilapia | LG15        | 26684556 | 4.00E-22 | 14330383 | 110 |
| 135135 | 11 | tilapia | LG8-24      | 29447820 | 9.00E-20 | 16653790 | 78  |
| 88334  | 11 | tilapia | LG2         | 25048291 | 6.00E-30 | 23221520 | 111 |
| 18172  | 11 | tilapia | LG2         | 25048291 | 1.00E-46 | 16511820 | 107 |
| 2566   | 11 | tilapia | LG2         | 25048291 | 7.00E-39 | 15288422 | 102 |

|        |    |         |             |          |          |          |     |
|--------|----|---------|-------------|----------|----------|----------|-----|
| 47254  | 11 | tilapia | LG2         | 25048291 | 1.00E-18 | 10444085 | 84  |
| 7828   | 11 | tilapia | LG2         | 25048291 | 3.00E-35 | 10374142 | 100 |
| 82738  | 12 | tilapia | LG10        | 17092887 | 3.00E-16 | 6778356  | 84  |
| 20338  | 12 | tilapia | scaffold8   | NA       | 2.00E-33 | 650097   | 108 |
| 50896  | 12 | tilapia | scaffold10  | NA       | 4.00E-37 | 1680258  | 103 |
| 72849  | 13 | tilapia | LG19        | 27159252 | 2.00E-39 | 5471797  | 107 |
| 13074  | 13 | Tilapia | LG19        | 27159252 | 6.00E-27 | 3912948  | 82  |
| 43690  | 13 | tilapia | LG19        | 27159252 | 1.00E-25 | 3114780  | 96  |
| 138263 | 13 | tilapia | LG19        | 27159252 | 9.00E-20 | 2186973  | 98  |
| 68249  | 13 | tilapia | LG19        | 27159252 | 6.00E-27 | 1322595  | 82  |
| 35488  | 13 | tilapia | LG19        | 27159252 | 1.00E-18 | 19391465 | 88  |
| 25842  | 13 | tilapia | LG19        | 27159252 | 7.00E-33 | 25935291 | 104 |
| 57774  | 13 | tilapia | LG19        | 27159252 | 2.00E-17 | 24976001 | 70  |
| 120000 | 13 | tilapia | scaffold236 | NA       | 1.00E-43 | 261485   | 106 |
| 67135  | 14 | tilapia | LG9         | 20956653 | 1.00E-24 | 8263710  | 98  |
| 124232 | 14 | tilapia | LG9         | 20956653 | 2.00E-45 | 4905076  | 109 |
| 86011  | 14 | tilapia | LG9         | 20956653 | 9.00E-20 | 1994927  | 86  |
| 102811 | 15 | tilapia | LG12        | 34679706 | 2.00E-17 | 34340099 | 54  |
| 60944  | 15 | tilapia | LG12        | 34679706 | 5.00E-18 | 29643656 | 91  |
| 27544  | 15 | tilapia | LG12        | 34679706 | 2.00E-17 | 33221583 | 54  |
| 103035 | 15 | tilapia | LG12        | 34679706 | 4.00E-31 | 4463867  | 69  |
| 89074  | 15 | tilapia | LG12        | 34679706 | 2.00E-20 | 7390764  | 107 |
| 42654  | 15 | tilapia | LG12        | 34679706 | 5.00E-46 | 12475370 | 110 |
| 49461  | 15 | tilapia | LG12        | 34679706 | 2.00E-30 | 12999594 | 91  |
| 52449  | 15 | tilapia | LG12        | 34679706 | 4.00E-34 | 21395792 | 110 |
| 110339 | 15 | tilapia | LG12        | 34679706 | 8.00E-17 | 22548755 | 69  |
| 49654  | 15 | tilapia | LG12        | 34679706 | 5.00E-18 | 24279788 | 91  |
| 92921  | 16 | tilapia | scaffold30  | NA       | 2.00E-33 | 983110   | 105 |
| 117088 | 17 | tilapia | LG16-21     | 34890008 | 2.00E-39 | 24506599 | 107 |
| 35124  | 17 | tilapia | LG16-21     | 34890008 | 6.00E-30 | 20371064 | 111 |
| 107705 | 17 | tilapia | LG16-21     | 34890008 | 2.00E-20 | 10242661 | 107 |
| 95987  | 18 | tilapia | LG22        | 26410405 | 2.00E-17 | 17476441 | 87  |
| 68597  | 18 | tilapia | LG1         | 31194787 | 2.00E-17 | 1956352  | 97  |
| 60870  | 18 | tilapia | LG22        | 26410405 | 1.00E-34 | 7337873  | 95  |
| 29586  | 18 | tilapia | LG22        | 26410405 | 9.00E-20 | 6392193  | 58  |
| 78539  | 18 | tilapia | LG22        | 26410405 | 7.00E-39 | 1725117  | 98  |
| 107830 | 19 | tilapia | LG18        | 26198306 | 1.00E-15 | 1648104  | 99  |
| 63950  | 19 | tilapia | LG18        | 26198306 | 6.00E-30 | 4430031  | 103 |
| 95865  | 19 | tilapia | LG18        | 26198306 | 6.00E-27 | 7113536  | 90  |
| 25517  | 19 | tilapia | LG18        | 26198306 | 4.00E-22 | 6917050  | 90  |

|        |    |             |            |          |          |          |     |
|--------|----|-------------|------------|----------|----------|----------|-----|
| 67084  | 19 | tilapia     | LG18       | 26198306 | 3.00E-50 | 8010479  | 109 |
| 26271  | 19 | tilapia     | LG18       | 26198306 | 2.00E-30 | 10395195 | 112 |
| 3078   | 19 | tilapia     | LG18       | 26198306 | 5.00E-18 | 11747611 | 51  |
| 34529  | 19 | tilapia     | LG18       | 26198306 | 1.00E-25 | 14013552 | 104 |
| 122299 | 19 | tilapia     | LG18       | 26198306 | 8.00E-51 | 22828155 | 110 |
| 43716  | 20 | tilapia     | LG13       | 32787261 | 3.00E-16 | 16538607 | 100 |
| 4469   | 20 | tilapia     | LG13       | 32787261 | 2.00E-30 | 11764859 | 108 |
| 132664 | 20 | tilapia     | LG13       | 32787261 | 6.00E-27 | 10199359 | 106 |
| 26739  | 20 | tilapia     | LG13       | 32787261 | 6.00E-27 | 10189582 | 78  |
| 21036  | 21 | tilapia     | LG17       | 31749960 | 3.00E-19 | 15765488 | 77  |
| 4370   | 21 | tilapia     | LG17       | 31749960 | 2.00E-36 | 16676140 | 110 |
| 14574  | 21 | tilapia     | LG17       | 31749960 | 3.00E-32 | 18448345 | 111 |
| 48454  | 21 | tilapia     | LG17       | 31749960 | 9.00E-20 | 18490652 | 78  |
| 69372  | 21 | tilapia     | LG17       | 31749960 | 1.00E-24 | 23733486 | 78  |
| 134952 | 21 | tilapia     | LG17       | 31749960 | 1.00E-18 | 8486526  | 60  |
| 61799  | 21 | tilapia     | LG17       | 31749960 | 2.00E-33 | 6985120  | 85  |
| 24976  | 21 | tilapia     | LG17       | 31749960 | 6.00E-21 | 6772819  | 68  |
| 20103  | 21 | tilapia     | LG20       | 31470686 | 2.00E-29 | 17556931 | 110 |
| 24087  | 22 | tilapia     | LG8-24     | 29447820 | 3.00E-32 | 7561884  | 110 |
| 37195  | 22 | tilapia     | LG9        | 20956653 | 1.00E-15 | 16088012 | 112 |
| 72695  | 22 | tilapia     | LG8-24     | 29447820 | 5.00E-40 | 23238281 | 104 |
| 83435  | 23 | tilapia     | scaffold2  | NA       | 2.00E-23 | 2314070  | 108 |
| 50756  | 23 | tilapia     | LG8-24     | 29447820 | 2.00E-17 | 16653790 | 78  |
| 72264  | 23 | tilapia     | scaffold2  | NA       | 1.00E-37 | 3309019  | 108 |
| 99870  | 23 | tilapia     | LG18       | 26198306 | 3.00E-16 | 23778455 | 56  |
| 102568 | 23 | tilapia     | scaffold2  | NA       | 9.00E-20 | 2781012  | 54  |
| 14690  | 23 | tilapia     | scaffold2  | NA       | 3.00E-32 | 1982515  | 116 |
| 28081  | 23 | tilapia     | scaffold2  | NA       | 2.00E-23 | 40130    | 116 |
| 134769 | 23 | tilapia     | scaffold13 | NA       | 1.00E-37 | 1610515  | 96  |
| 45048  | 23 | tilapia     | scaffold13 | NA       | 2.00E-17 | 911984   | 102 |
| 50742  | 23 | tilapia     | scaffold2  | NA       | 4.00E-22 | 3725596  | 62  |
| 44613  | 23 | tilapia     | scaffold37 | NA       | 5.00E-18 | 186882   | 91  |
| 138376 | 23 | tilapia     | scaffold37 | NA       | 1.00E-24 | 750203   | 110 |
| 67271  | 23 | tilapia     | scaffold35 | NA       | 2.00E-27 | 489624   | 107 |
| 122919 | 23 | tilapia     | scaffold1  | NA       | 4.00E-31 | 7541858  | 101 |
| 26368  | 23 | tilapia     | LG15       | 26684556 | 2.00E-20 | 1613651  | 87  |
| 111928 | 23 | tilapia     | scaffold1  | NA       | 2.00E-20 | 5751988  | 55  |
| 88889  | 23 | tilapia     | scaffold1  | NA       | 6.00E-21 | 4930700  | 100 |
| 92986  | 1  | stickleback | LG7        | 27937443 | 1.00E-29 | 5268693  | 82  |
| 24490  | 2  | stickleback | LG9        | 20249479 | 7.00E-19 | 11066750 | 84  |

|        |    |             |             |          |          |          |     |
|--------|----|-------------|-------------|----------|----------|----------|-----|
| 16242  | 2  | stickleback | LG9         | 20249479 | 8.00E-31 | 14844617 | 104 |
| 41452  | 3  | stickleback | LG1         | 28185914 | 3.00E-21 | 15989330 | 104 |
| 63761  | 3  | stickleback | LG11        | 16706052 | 7.00E-16 | 2155417  | 59  |
| 20407  | 4  | stickleback | LG17        | 14603141 | 1.00E-11 | 3882191  | 44  |
| 137502 | 4  | stickleback | scaffold161 | 158182   | 2.00E-16 | 5752     | 52  |
| 100566 | 5  | stickleback | LG13        | 19368704 | 2.00E-46 | 2981141  | 110 |
| 124145 | 5  | stickleback | LG13        | 19368704 | 5.00E-23 | 4597623  | 99  |
| 70700  | 5  | stickleback | LG13        | 19368704 | 2.00E-13 | 17013080 | 51  |
| 15733  | 5  | stickleback | LG13        | 19368704 | 4.00E-17 | 6347398  | 69  |
| 11412  | 6  | stickleback | LG20        | 19732071 | 4.00E-14 | 10783875 | 52  |
| 75436  | 6  | stickleback | LG20        | 19732071 | 4.00E-11 | 6554303  | 87  |
| 38956  | 7  | stickleback | LG7         | 18401067 | 1.00E-17 | 10051916 | 78  |
| 27002  | 7  | stickleback | LG7         | 18401067 | 2.00E-28 | 7500971  | 88  |
| 1438   | 8  | stickleback | LG1         | 28185914 | 7.00E-19 | 7151749  | 84  |
| 50804  | 8  | stickleback | LG2         | 23295652 | 2.00E-16 | 9015372  | 52  |
| 3820   | 10 | stickleback | LG18        | 16282716 | 4.00E-20 | 15514611 | 98  |
| 57690  | 10 | stickleback | LG18        | 16282716 | 4.00E-20 | 8245539  | 78  |
| 88334  | 11 | stickleback | LG4         | 32632948 | 3.00E-24 | 14020516 | 85  |
| 18172  | 11 | stickleback | LG4         | 32632948 | 8.00E-28 | 9477753  | 107 |
| 72849  | 13 | stickleback | LG15        | 16198764 | 5.00E-23 | 8839077  | 99  |
| 13074  | 13 | stickleback | LG15        | 16198764 | 2.00E-22 | 7264942  | 62  |
| 75998  | 13 | stickleback | LG18        | 16282716 | 1.00E-17 | 189633   | 90  |
| 120000 | 13 | stickleback | scaffold84  | 563433   | 2.00E-34 | 56700    | 110 |
| 79799  | 14 | stickleback | LG2         | 23295652 | 1.00E-11 | 6873776  | 44  |
| 86011  | 14 | stickleback | scaffold37  | 2648413  | 4.00E-11 | 2017509  | 43  |
| 27654  | 15 | stickleback | LG13        | 20083130 | 6.00E-13 | 19696724 | 110 |
| 92921  | 16 | stickleback | LG19        | 20240660 | 1.00E-14 | 8048874  | 81  |
| 18097  | 17 | stickleback | LG14        | 15246461 | 4.00E-17 | 7950866  | 49  |
| 35783  | 18 | stickleback | LG19        | 20240660 | 1.00E-17 | 1908224  | 66  |
| 29586  | 18 | stickleback | LG10        | 15657440 | 3.00E-18 | 1653488  | 59  |
| 67084  | 19 | stickleback | LG3         | 16798506 | 2.00E-13 | 7194870  | 51  |
| 3078   | 19 | stickleback | LG3         | 16798506 | 6.00E-13 | 1040262  | 50  |
| 4370   | 21 | stickleback | LG4         | 32632948 | 2.00E-13 | 32139127 | 95  |
| 134952 | 21 | stickleback | LG4         | 32632948 | 1.00E-20 | 24701738 | 59  |
| 24976  | 21 | stickleback | LG4         | 32632948 | 1.00E-14 | 24625077 | 65  |
| 72264  | 23 | stickleback | scaffold74  | 682422   | 3.00E-15 | 404572   | 110 |
| 102568 | 23 | stickleback | scaffold74  | 682422   | 6.00E-13 | 497533   | 54  |
| 14690  | 23 | stickleback | scaffold868 | 8898     | 2.00E-16 | 1513     | 64  |
| 67271  | 23 | stickleback | LG1         | 28185914 | 7.00E-22 | 22922476 | 109 |
| 122919 | 23 | stickleback | LG1         | 28185914 | 2.00E-16 | 23030100 | 104 |

|        |    |             |                |          |          |          |     |
|--------|----|-------------|----------------|----------|----------|----------|-----|
| 88889  | 23 | stickleback | LG1            | 28185914 | 4.00E-11 | 24446156 | 63  |
| 120613 | 23 | stickleback | scaffold37     | 2648413  | 4.00E-17 | 1572885  | 101 |
| 21428  | 2  | medaka      | LG14           | 33607196 | 3.00E-19 | 22450795 | 57  |
| 41452  | 3  | medaka      | LG13           | 33409148 | 7.00E-11 | 3373606  | 83  |
| 63761  | 3  | medaka      | LG2            | 31118443 | 2.00E-26 | 18951700 | 105 |
| 26388  | 3  | medaka      | LG2            | 31118443 | 3.00E-22 | 14124612 | 102 |
| 137502 | 4  | medaka      | LG10           | 27595823 | 1.00E-15 | 8274156  | 83  |
| 13782  | 4  | medaka      | LG3            | 36623554 | 2.00E-11 | 31113012 | 84  |
| 100566 | 5  | medaka      | LG4            | 34636364 | 4.00E-28 | 4980768  | 100 |
| 107800 | 5  | medaka      | LG4            | 34636364 | 1.00E-12 | 4330103  | 98  |
| 15733  | 5  | medaka      | LG4            | 34636364 | 1.00E-18 | 19572539 | 72  |
| 77318  | 5  | medaka      | LG2            | 31118443 | 2.00E-11 | 15975794 | 44  |
| 74916  | 6  | medaka      | scaffold1291   | 41275    | 8.00E-20 | 33765    | 82  |
| 75436  | 6  | medaka      | LG16           | 30014384 | 3.00E-13 | 9175586  | 79  |
| 34216  | 6  | medaka      | LG16           | 30014384 | 5.00E-21 | 24841705 | 68  |
| 38956  | 7  | medaka      | LG7            | 29492121 | 1.00E-12 | 10771070 | 42  |
| 27002  | 7  | medaka      | LG7            | 29492121 | 8.00E-14 | 7334160  | 84  |
| 97846  | 8  | medaka      | LG2            | 31118443 | 3.00E-13 | 14773235 | 87  |
| 68802  | 8  | medaka      | LG4            | 34636364 | 5.00E-12 | 16655998 | 53  |
| 94574  | 9  | medaka      | ultracontig200 | 430158   | 1.00E-21 | 59730    | 85  |
| 27881  | 10 | medaka      | LG17           | 31848461 | 4.00E-25 | 17111205 | 103 |
| 21526  | 10 | medaka      | LG21           | 31883787 | 2.00E-11 | 24961711 | 68  |
| 88334  | 11 | medaka      | LG10           | 27595823 | 8.00E-17 | 16770921 | 85  |
| 72849  | 13 | medaka      | LG22           | 28810691 | 3.00E-22 | 7337472  | 82  |
| 75998  | 13 | medaka      | scaffold683    | 122730   | 7.00E-11 | 5028     | 55  |
| 120000 | 13 | medaka      | LG22           | 28810691 | 8.00E-20 | 3630293  | 110 |
| 129708 | 14 | medaka      | LG4            | 34636364 | 5.00E-21 | 9010233  | 88  |
| 55683  | 15 | medaka      | LG17           | 31848461 | 2.00E-11 | 12931451 | 92  |
| 68027  | 15 | medaka      | LG5            | 33792114 | 1.00E-12 | 6695963  | 94  |
| 89023  | 17 | medaka      | LG24           | 24165179 | 1.00E-18 | 23791478 | 108 |
| 31725  | 18 | medaka      | LG4            | 34636364 | 1.00E-12 | 16656003 | 50  |
| 68597  | 18 | medaka      | LG1            | 39973033 | 2.00E-14 | 23062020 | 69  |
| 35783  | 18 | medaka      | LG8            | 25865442 | 5.00E-12 | 18836136 | 65  |
| 29586  | 18 | medaka      | LG11           | 29412213 | 2.00E-11 | 16782738 | 64  |
| 67084  | 19 | medaka      | LG17           | 31848461 | 1.00E-34 | 23372248 | 95  |
| 4370   | 21 | medaka      | LG23           | 24050845 | 5.00E-15 | 20523753 | 110 |
| 134952 | 21 | medaka      | scaffold860    | 79008    | 7.00E-11 | 55225    | 59  |
| 29868  | 22 | medaka      | LG4            | 34636364 | 3.00E-19 | 29433512 | 97  |
| 72264  | 23 | medaka      | LG2            | 31118443 | 7.00E-11 | 4404859  | 111 |
| 53364  | 23 | medaka      | LG7            | 29492121 | 2.00E-32 | 22947530 | 107 |
